# Supplementary material for: Flagellar region 3b supports strong expression of integrated DNA and the highest chromosomal integration efficiency of the Escherichia coli flagellar regions
Source: PubMed Central journal article supplement (PMC4476827; doi:10.1111/1751-7915.12296), 2015-06-15

## 1 **Supporting Information**

### 2 **S1 Fig. Verification of chromosomal integrations into the *E. coli* flagellar region 2.**

3 Chromosomal integrations into the target genes of the *E. coli* K12 MG1655 flagellar region 2  
4 (*motA* (motAi), *motB* (motBi), *flhD* (flhDi), *flhE* (flhEi), *cheW* (cheWi), *cheY* (cheYi), and  
5 *cheZ* (cheZi)) verified by PCR with flanking primers. Wt (wild type), +i (integrated DNA  
6 fragment). HyperLadder 1kb (Bioline) has been used as the molecular weight marker.

7 (TIFF)

8

### 9 **S2 Fig. Growth rates of the engineered *E. coli* strains with integrations in the flagellar** 10 **region 2.**

11 Growth rates (measured as absorbance over time with the microplate reader) of the engineered  
12 strains with integrations in the investigated target loci of the flagellar region 2 (*motA* (motAi),  
13 *motB* (motBi), *flhD* (flhDi), *flhE* (flhEi), *cheW* (cheWi), *cheY* (cheYi), and *cheZ* (cheZi))  
14 compared to the *E. coli* K12 MG1655 wild type (wt). Values represent averages and standard  
15 errors from three independent replicates. Raw absorbance plate reader data are shown in the  
16 S2 Table.

17

### 18 **S3 Fig. Integrations into the *E. coli* flagellar region 3b do not negatively impact growth.**

19 Microplate reader ((Fluostar Omega) absorbance measurement of the growth of the  
20 engineered strains with integrations into the target loci of the *E. coli* K12 MG1655 flagellar  
21 region 3b (*fliE* (fliEi), *fliF* (fliFi), *fliG* (fliGi), *fliJ* (fliJi), *fliK* (fliKi), *fliL* (fliLi), *fliM* (fliMi),  
22 *fliP* (fliPi), and *fliR* (fliRi)). The figure shows means and standard errors from three  
23 experiments.

24

25

26

1 **S4 Fig. GFP fluorescence measurement of the *E. coli* flagellar region 2 integrations.**

2 Figure shows verification of the integration of the genetic circuit Repr-ts-1 into the target loci  
3 of the flagellar region 2 (*motA* (*motAi*), *motB* (*motBi*), *flhD* (*flhDi*), *flhE* (*flhEi*), *cheW*  
4 (*cheWi*), *cheY* (*cheYi*), and *cheZ* (*cheZi*)) by quantification of the GFP fluorescence over time  
5 with the Fluostar Omega fluorimeter. Temperature shift to 42 °C (grey dashed line) after 3  
6 hours of growth at 30 °C led to the expression of GFP in the *E. coli* strains harbouring  
7 integrations in the target loci. Fluorescence signal saturated the fluorimeter detector (260000)  
8 after 5 hours of growth in the control strain without the repressor (wt + GFP). Wt (*E. coli* K12  
9 MG1655 wild type). Values represent averages and standard errors from three independent  
10 experiments.

11

12 **S5 Fig. GFP fluorescence measurement of the *E. coli* flagellar region 3b integrations.**

13 Chromosomal integrations of the genetic circuit Repr-ts-1 into the target loci of the *E. coli*  
14 K12 MG1655 flagellar region 3b (*fliE* (*fliEi*), *fliF* (*fliFi*), *fliG* (*fliGi*), *fliJ* (*fliJi*), *fliK* (*fliKi*),  
15 *fliL* (*fliLi*), *fliM* (*fliMi*), *fliP* (*fliPi*), and *fliR* (*fliRi*)) were confirmed by measuring GFP  
16 fluorescence over time employing microplate reader (Fluostar Omega). The temperature shift  
17 from 30 °C to 42 °C (grey dashed line) after 3 hours of growth triggered Repr-ts-1 controlled  
18 GFP expression in the engineered strains with the chromosomal integrations in the target loci  
19 of the flagellar region 3b. GFP fluorescence was off the chart (260000) after 5 hours of  
20 growth in the positive control strain (wt + GFP). Wt (*E. coli* K12 MG1655 wild type). *fliEi*,  
21 *Fi*, *Gi*, *Ji*, *Ki*, *Li*, *Mi*, *Pi*, *Ri* (engineered *E. coli* K12 MG1655 strains with chromosomal  
22 integrations in the analysed genes of the flagellar region 3b harbouring pR promoter  
23 controlled GFP-expressing plasmid). wt + GFP (positive control strain harbouring pR  
24 promoter controlled GFP-expressing plasmid without the integrated the Repr-ts-1-bourne  
25 repressor).

26

1 **S6 Fig. mCherry fluorescence quantitation of the *E. coli* flagellar region 2 integrations.**

2 Figure depicts confirmation of the integration of the genetic circuit into the target sites of the  
3 flagellar region 2 (*motA* (motAi), *motB* (motBi), *flhD* (flhDi), *flhE* (flhEi), *cheW* (cheWi),  
4 *cheY* (cheYi), and *cheZ* (cheZi)) by measuring the mCherry fluorescence with the Fluostar  
5 Omega fluorimeter. Temperature shift to 42 °C (grey dashed line) after 3 hours of growth at  
6 30 °C led to the expression of mCherry in the *E. coli* with integrations in the target sites.  
7 Fluorescence signal saturated the fluorimeter detector after 5 hours of growth in the control  
8 strain without the repressor (wt + mCherry). Wt (*E. coli* K12 MG1655 wild type). Values  
9 represent averages and standard errors from three replicates.

10

11 **S7 Fig. mCherry fluorescence quantitation of the *E. coli* flagellar region 3b integrations.**

12 Integrations into the target sites of the *E. coli* K12 MG1655 flagellar region 3b (*fliE* (fliEi),  
13 *fliF* (fliFi), *fliG* (fliGi), *fliJ* (fliJi), *fliK* (fliKi), *fliL* (fliLi), *fliM* (fliMi), *fliP* (fliPi), and *fliR*  
14 (fliRi)) were confirmed by measuring mCherry fluorescence over time with the microplate  
15 reader (Fluostar Omega). The temperature shift from 30 °C to 42 °C (grey dashed line) after 3  
16 hours of growth triggered expression of the red fluorescent protein mCherry in the strains  
17 with integrations in the target sites of the flagellar region 3b. mCherry fluorescence was off  
18 the chart after 5 hours of growth in the positive control strain (wt + mCherry). Wt (*E. coli*  
19 K12 MG1655 wild type). fliEi, Fi, Gi, Ji, Ki, Li, Mi, Pi, Ri (*E. coli* K12 MG1655 with  
20 integrations in the analysed loci of the flagellar region 3b harbouring plasmid pSB1A1(mCh).  
21 wt + mCherry (positive control strain harbouring pSB1A1(mCh) without the integrated Repr-  
22 ts-1 repressor).

S1 Fig.

## Flagellar region 2

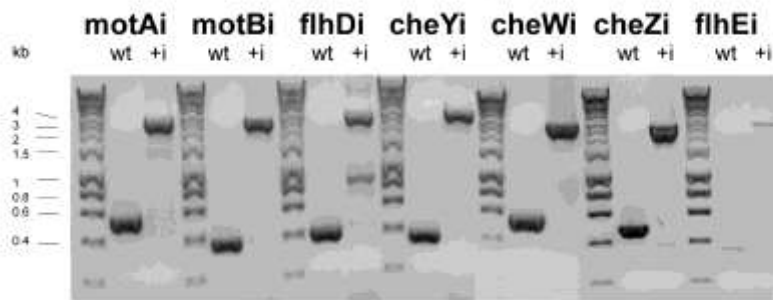

## Flagellar region 3b

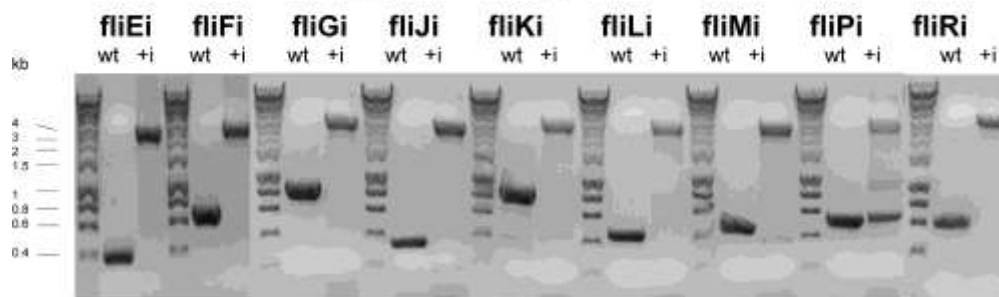

S2 Fig.

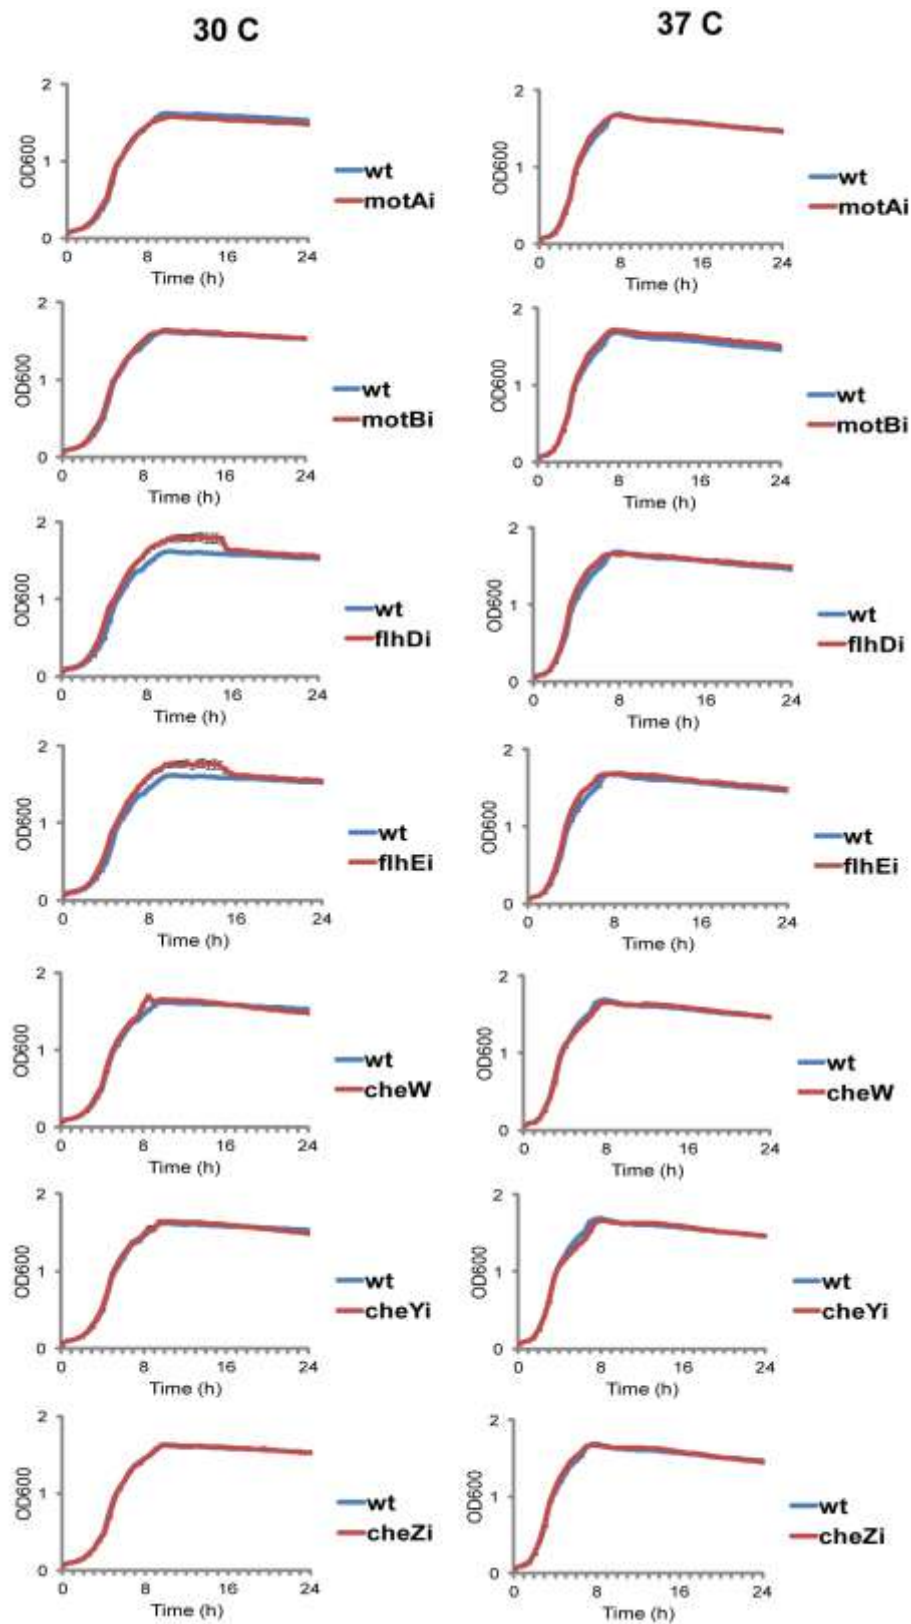

S3 Fig.

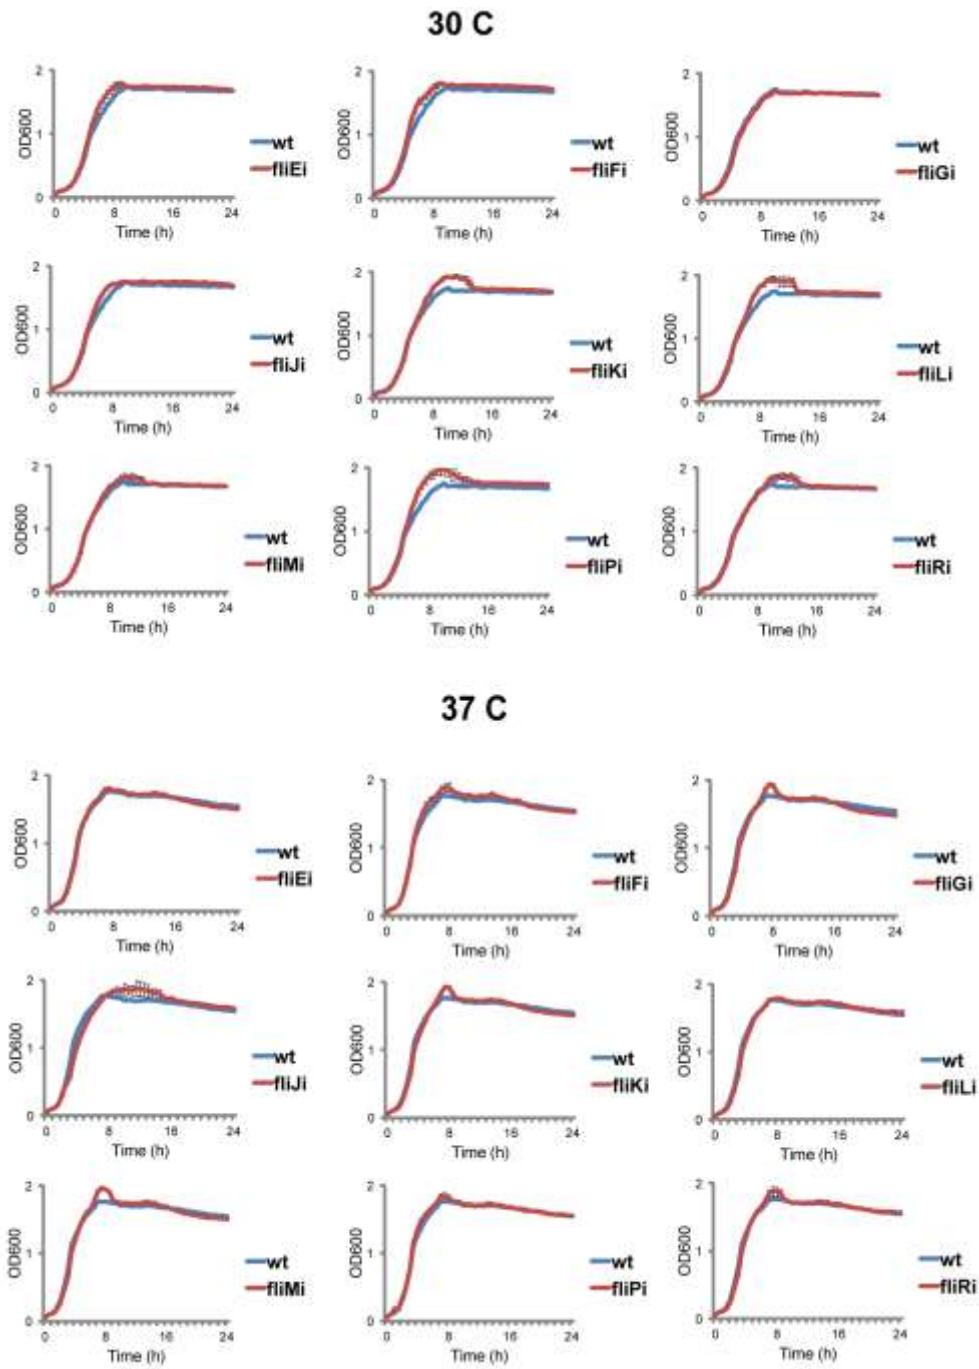

S4 Fig.

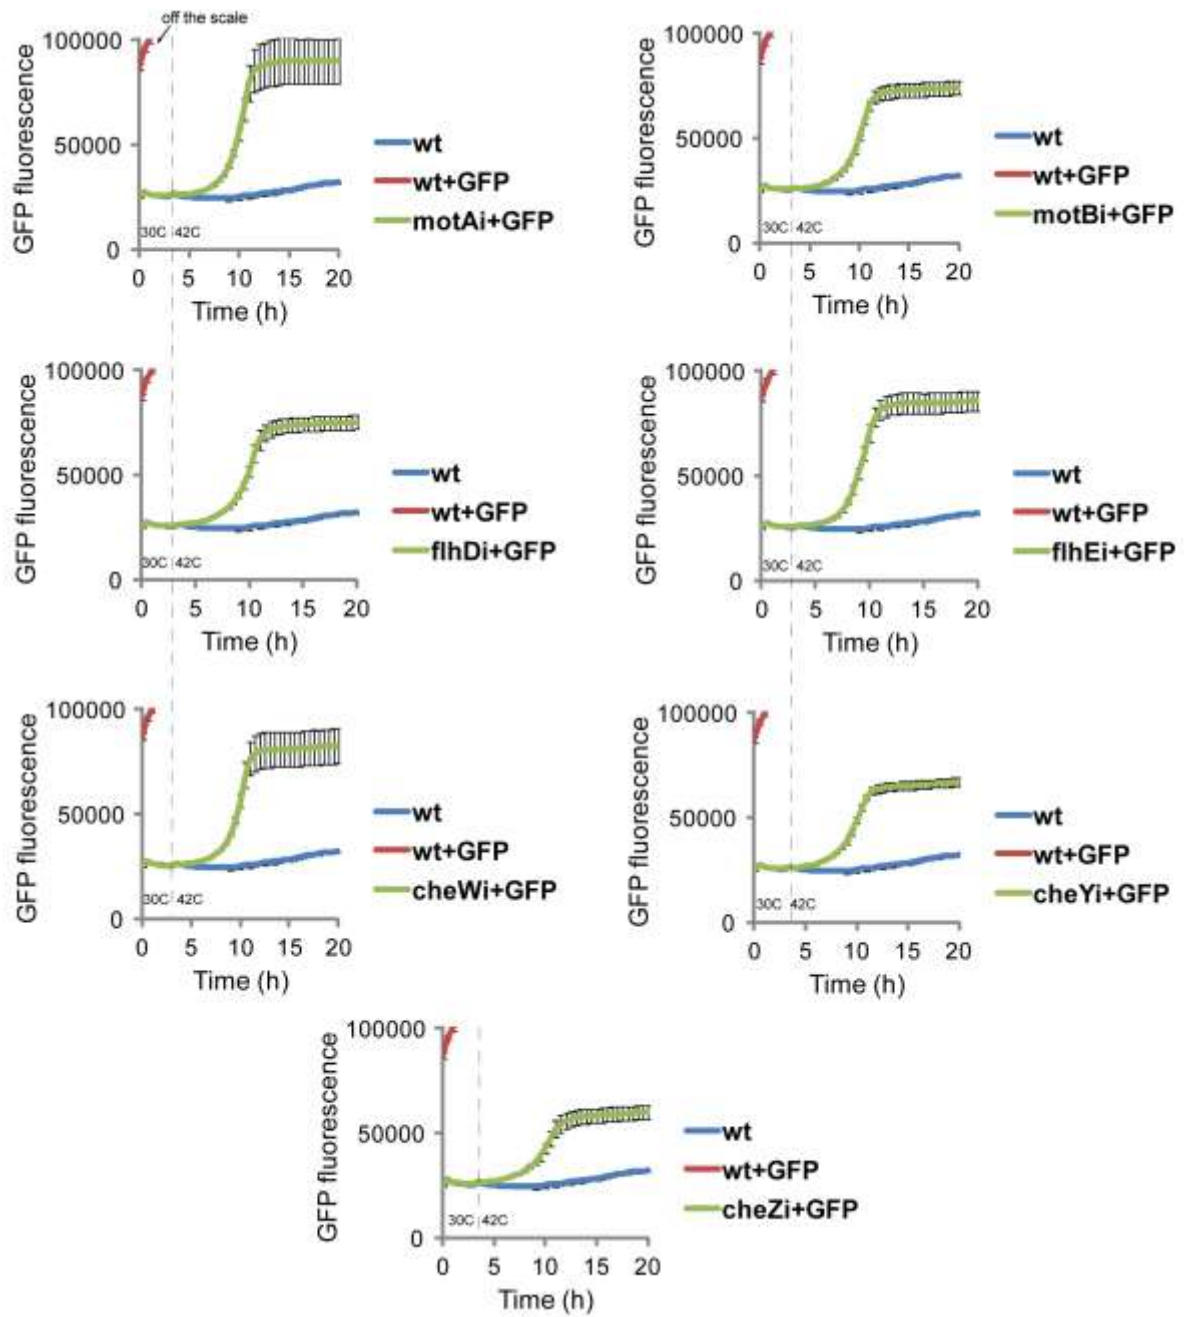

S5 Fig.

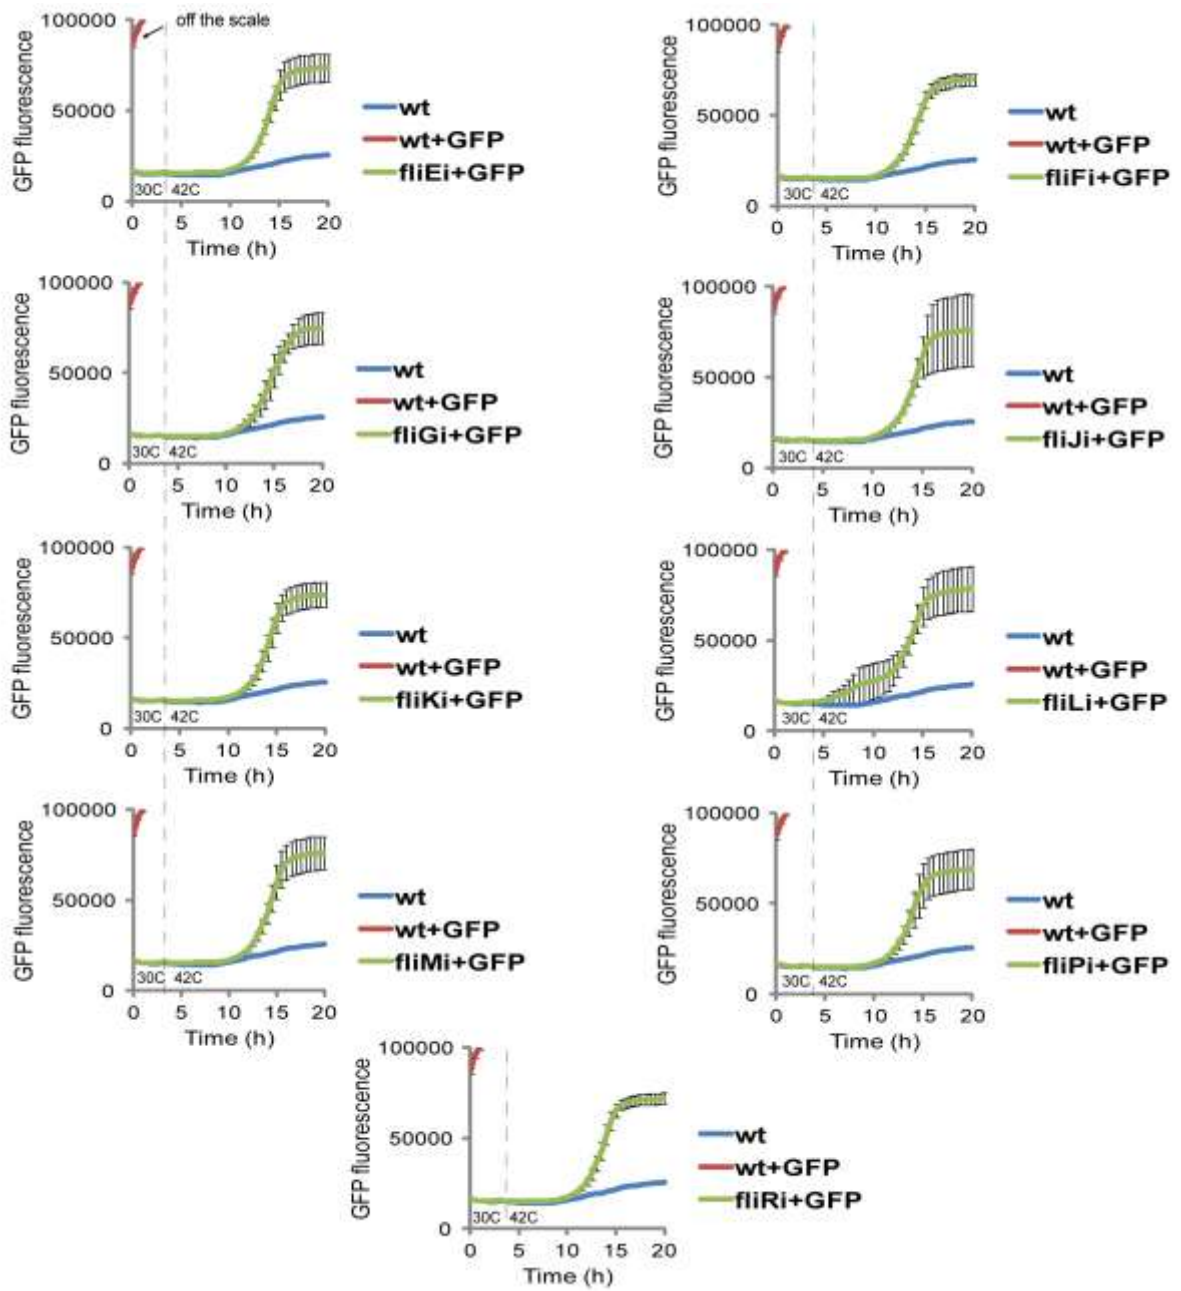



S6 Fig.

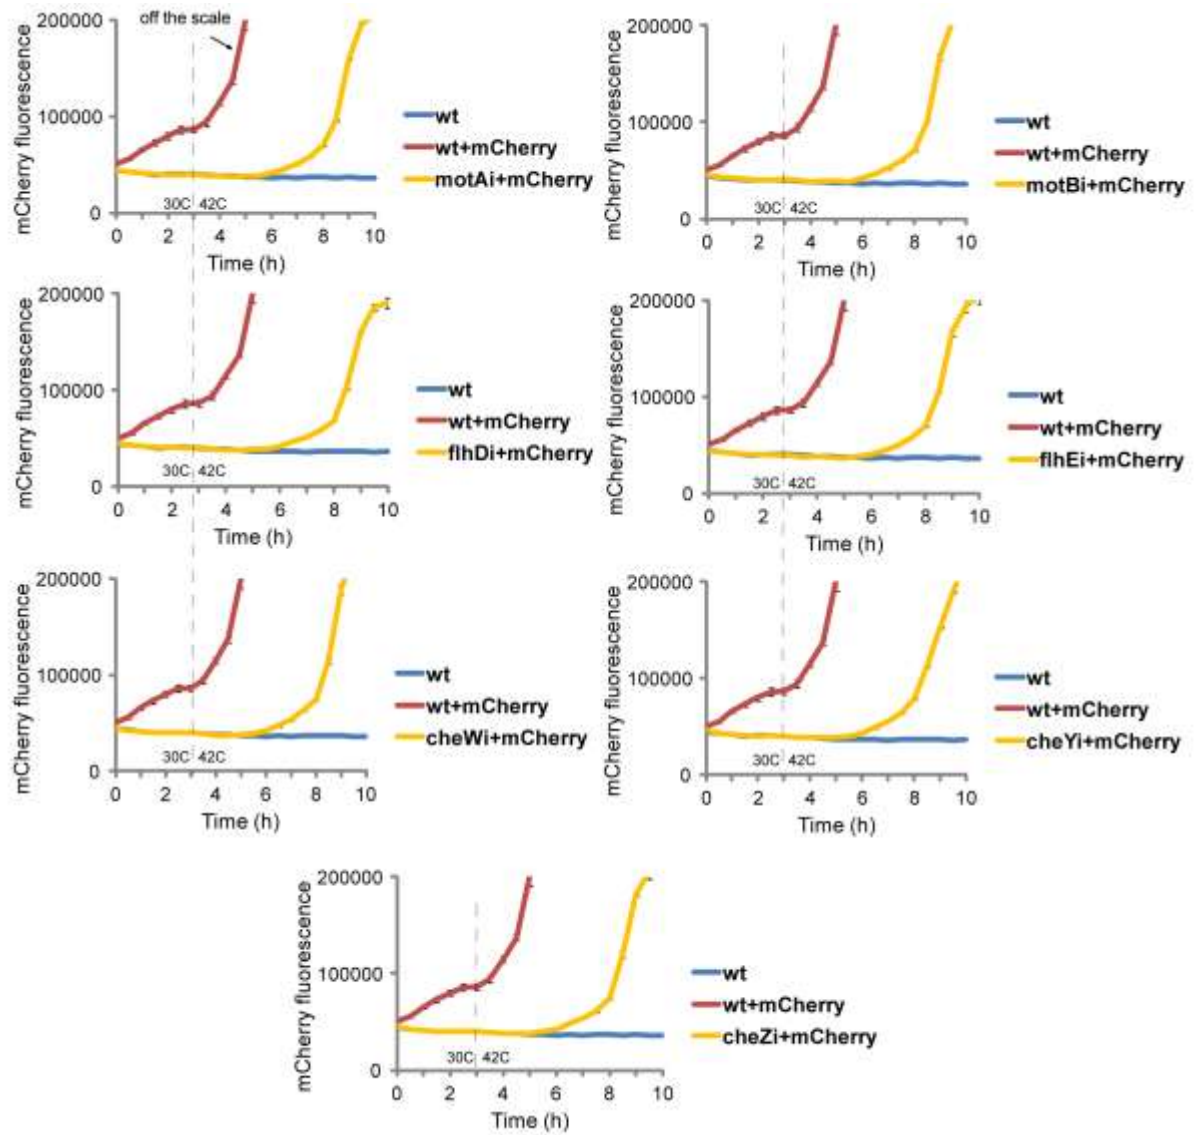

S7 Fig.

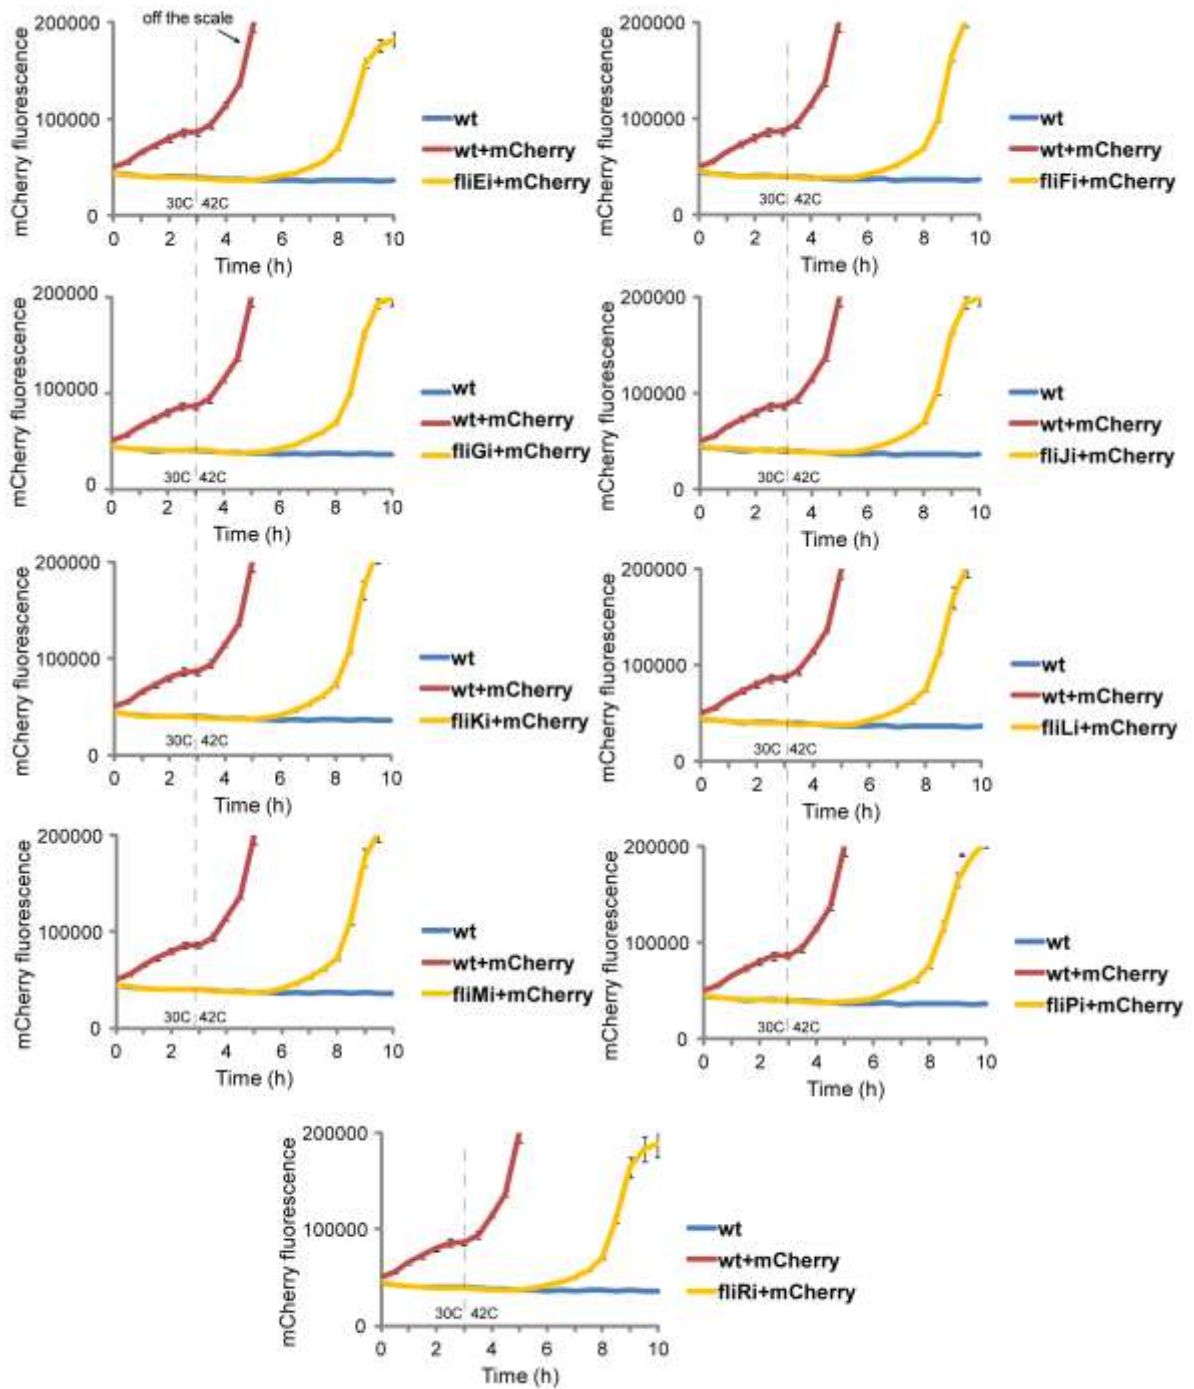

Supplement: mbt20008-0726-sd1.pdf [file mbt20008-0726-sd1.pdf]
